# Supplementary material for: Preparation of carbon-coated brookite@anatase TiO2 heterophase junction nanocables with enhanced photocatalytic performance
Source: Royal Society of Chemistry journal article supplement (doi:10.1039/d0pp00004c), 2020-05-21
Supplement: d0pp00004c1.pdf [file d0pp00004c1.pdf]

**Preparation of carbon-coated brookite@anatase TiO<sub>2</sub> heterophase junction  
nanocable with enhanced photocatalytic performance**

*Rui Tan*<sup>1</sup>, *Yonglin Wang*<sup>1</sup>, *Zhouzheng Jin*<sup>1</sup>, *Peng Zhang*<sup>1</sup>, *Hengzhi Luo*<sup>2</sup>, *Dan  
Liu*<sup>\*1, 3</sup>, *Bhekie B. Mamba*<sup>3</sup>, *Alex T. Kuvarega*<sup>3</sup>, *Jianzhou Gui*<sup>\*1, 3</sup>

<sup>1</sup> State Key Laboratory of Separation Membranes and Membrane Processes, Tianjin  
Key Laboratory of Green Chemical Technology and Process Engineering, School of  
Chemistry and Chemical Engineering, Tiangong University, Tianjin 300387, China

<sup>2</sup> Fushun YiKeSi New Materials Co., Ltd., Fushun, Liaoning, 113000

<sup>3</sup> College of Science, Engineering and Technology, University of South Africa,  
Nanotechnology and Water Sustainability Research Unit, Florida Science Campus  
1710, South Africa

\* Corresponding Authors

Tel: +86-022-83955521, E-mail: liudan@tjpu.edu.cn (Dan Liu);

Tel: +86-022-83955521, E-mail: guijz@tjpu.edu.cn (Jianzhou Gui)

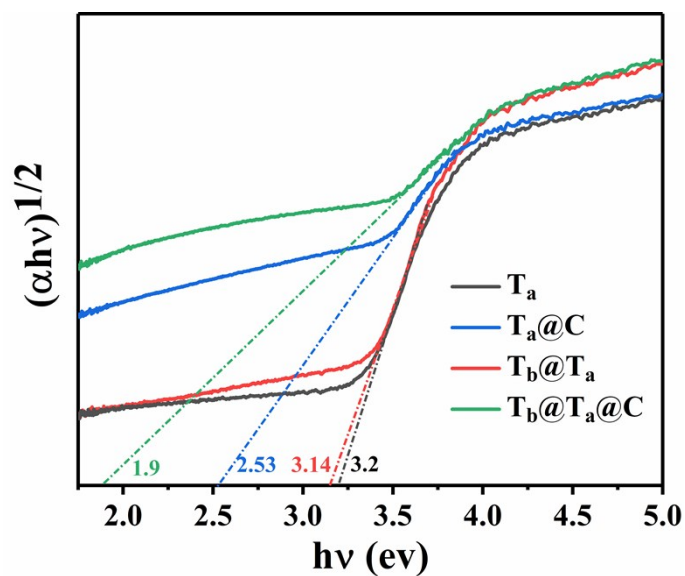

Figure S1. Plots of  $(\alpha h\nu)^{1/2}$  vs.  $h\nu$  for  $T_a$ ,  $T_a@C$ ,  $T_b@T_a$ , and  $T_b@T_a@C$ .

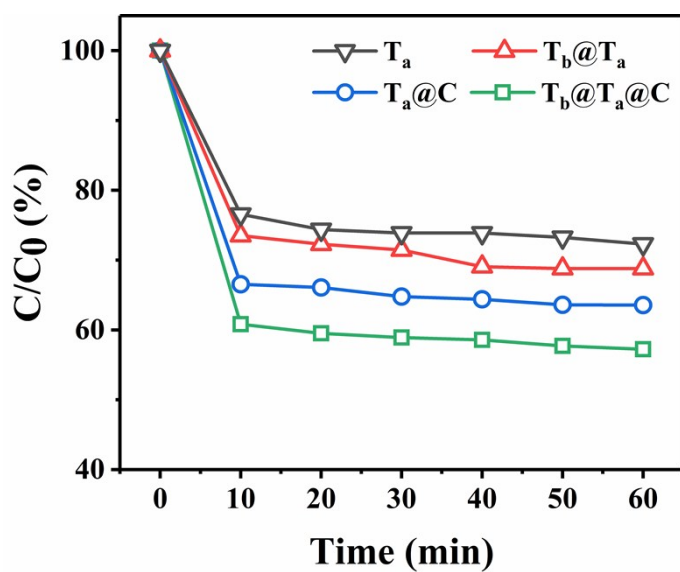

Figure S2. Time-dependent adsorption of  $T_a$ ,  $T_a@C$ ,  $T_b@T_a$ , and  $T_b@T_a@C$  for TC in dark. Experimental conditions: 20 mg sample was added to 40 mL TC aqueous solution (20 mg/L), and kept stirring in dark. Collected 3.5 mL mixture every 10 min and centrifuged at 9000 rpm/min for 10 min to separate the solid sample from the solution.
